# Supplementary material
Source: PubMed Central journal article supplement (PMC4946427)
Supplement: MCB.00166-16_zmb999101273so1.pdf [file MCB.00166-16_zmb999101273so1.pdf]

## Supplemental Material

**Fig S1. Gene targeting strategy for Mpc1 hypomorphic allele in mouse.** Related to **Fig 3** and **Fig 4**. (A) Exon diagram of *Mpc1* locus and schematic of Mpc1 knock-in allele. Mpc1 is encoded by a five exon gene, and the knock-in reporter construct was targeted to the last three exons of the *Mpc1* locus. The Mpc1 deletion allele was generated by germline expression of a Cre recombinase transgene and subsequent inheritance of the deletion allele without Cre. (B) Body weights (mean  $\pm$  SD, in mg) of e17.5 embryos from all crosses (n=10-64).

**Fig S2. Changes in lipid abundance and acyl composition reflect tissue-specific alterations in Mpc1-deficient liver.** Related to **Fig 7**. Total acyl content is decreased in Mpc1 KI e17.5 liver. Acyl composition from total lipid extract was measured by GC-MS as pentafluorobenzyl bromide esters and is shown as  $\mu\text{g FA/mg protein}$  (mean  $\pm$  SD, n=5). (\*p<0.05 by Student's t-test)

**Fig S3. Transcriptional regulation of glucose metabolism-related genes in Mpc1-deficient embryonic tissues.** Related to **Fig 7**. (A) mRNA expression of genes involved in glucose metabolism in e17.5 Mpc1 KI/KI cerebral cortex, heart (B), and liver (C) by qRT-PCR array. Data is presented as fold-change relative to WT (mean  $\pm$  SEM, n=3). Asterisks indicate significant differences by Student's t-test (p<0.05).

**Fig S4. Generation of GPT KO HEK293T cells.** Related to **Fig 9**. (A) Dose-dependent impairment of [2-<sup>14</sup>C]pyruvate incorporation into the total lipid fraction in HEK293T cells treated with UK-5099, an inhibitor of the MPC (mean  $\pm$  SEM, n=3). (B) Genomic mutations identified in *GPT1*, *GPT2*, and pan GPT knockout (KO) HEK293T clones used for flux experiments in **Fig 9**. The guide RNA (gRNA) target site is shown in blue with the protospacer-adjacent motif in red. Predicted mutations at the protein level are listed at right. (C) Alanine aminotransferase activity assay in select GPT KO HEK293T clones (mean  $\pm$  SEM, n=4). Significant differences as determined by Tukey post-hoc test (p<0.05) after one-way ANOVA are indicated by different letters.

**Table S1. List of metabolites significantly regulated in Mpc1 KI/KI brain or liver.** Values shown are fold-change over WT and p-value as determined by Welch's two-sample t-test (n=8).

Figure S1

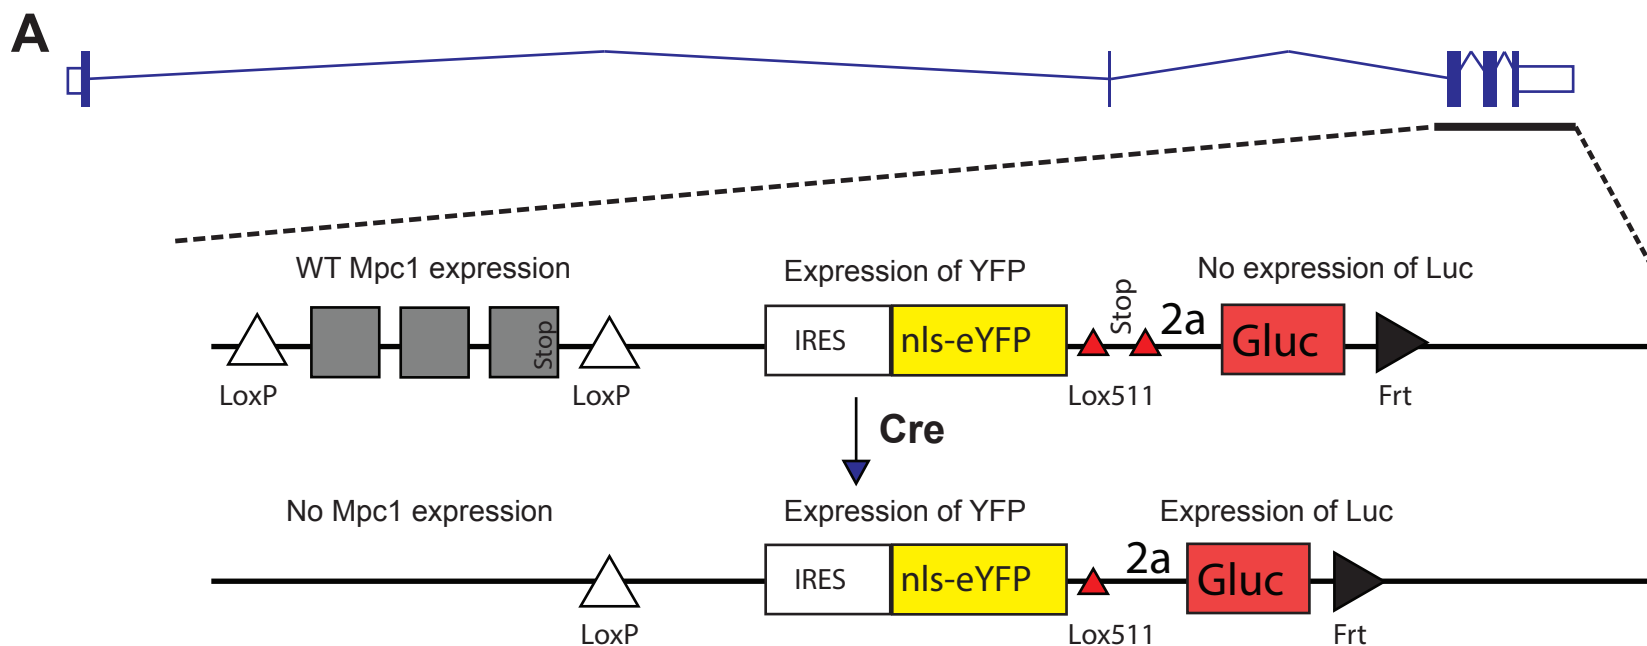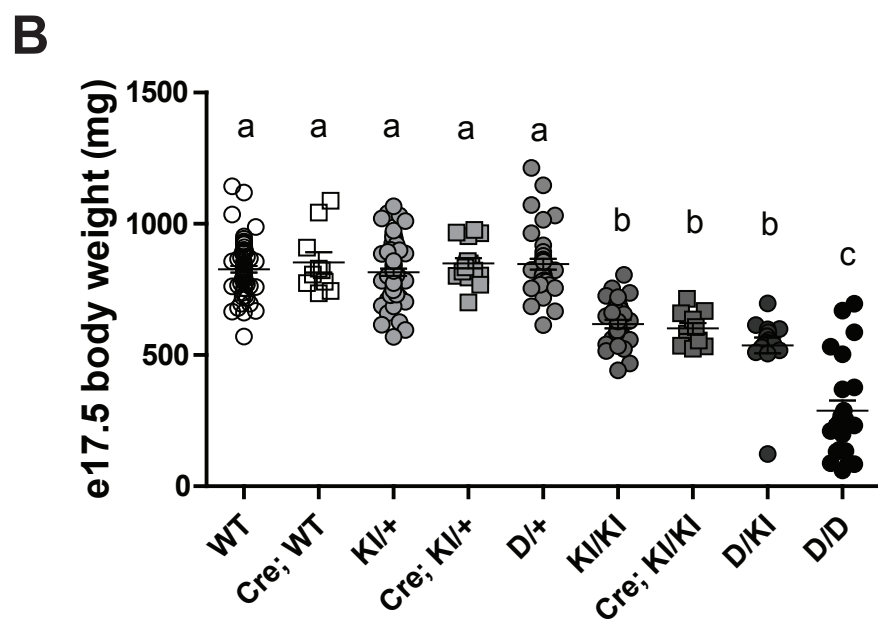

Figure S2

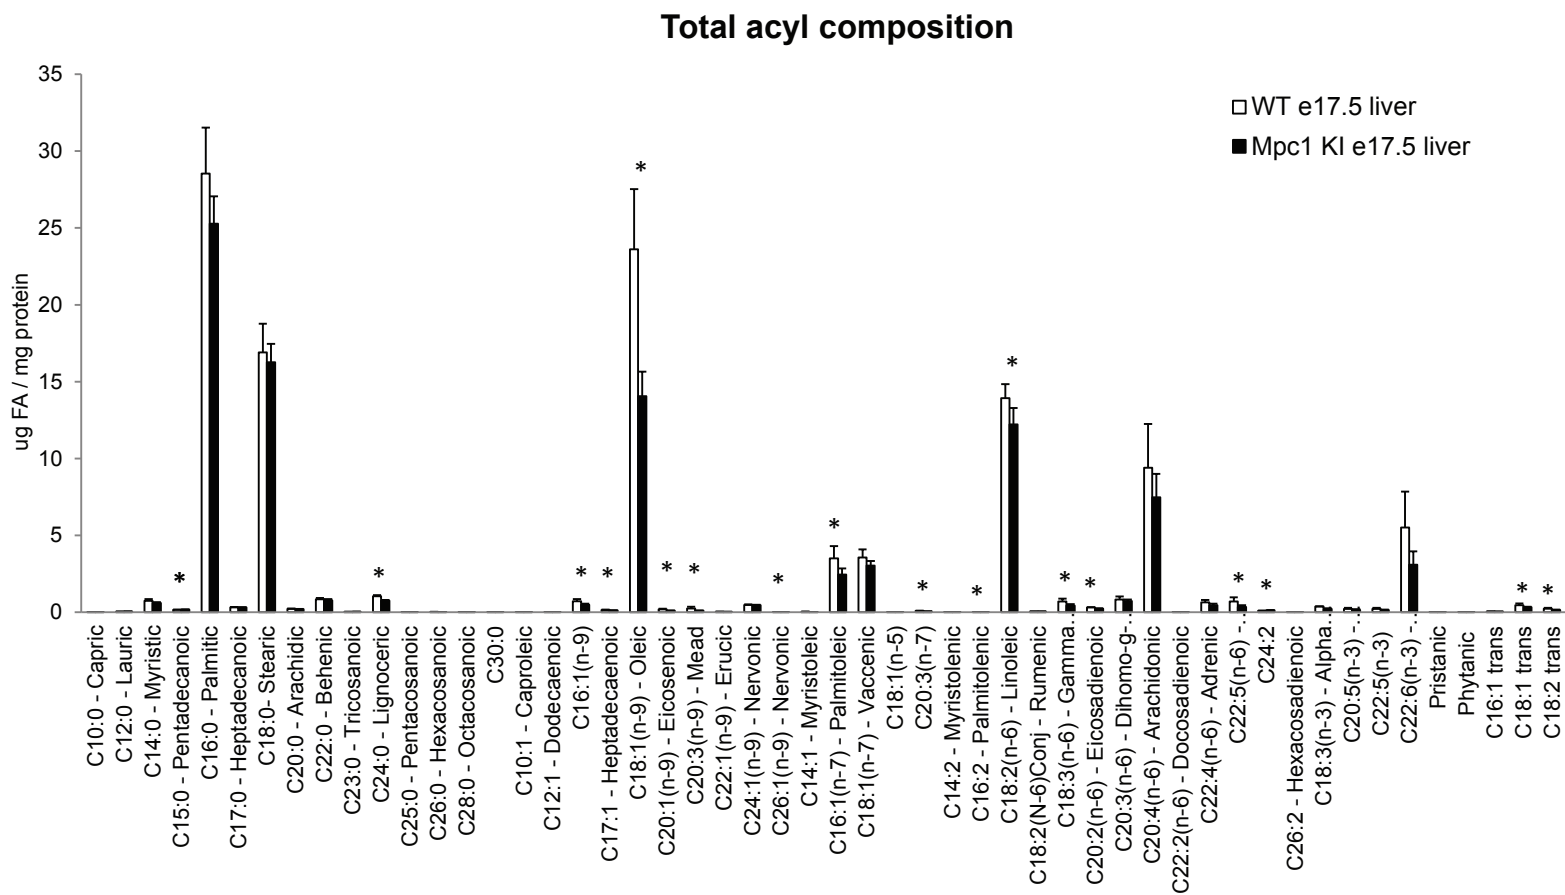

Figure S3

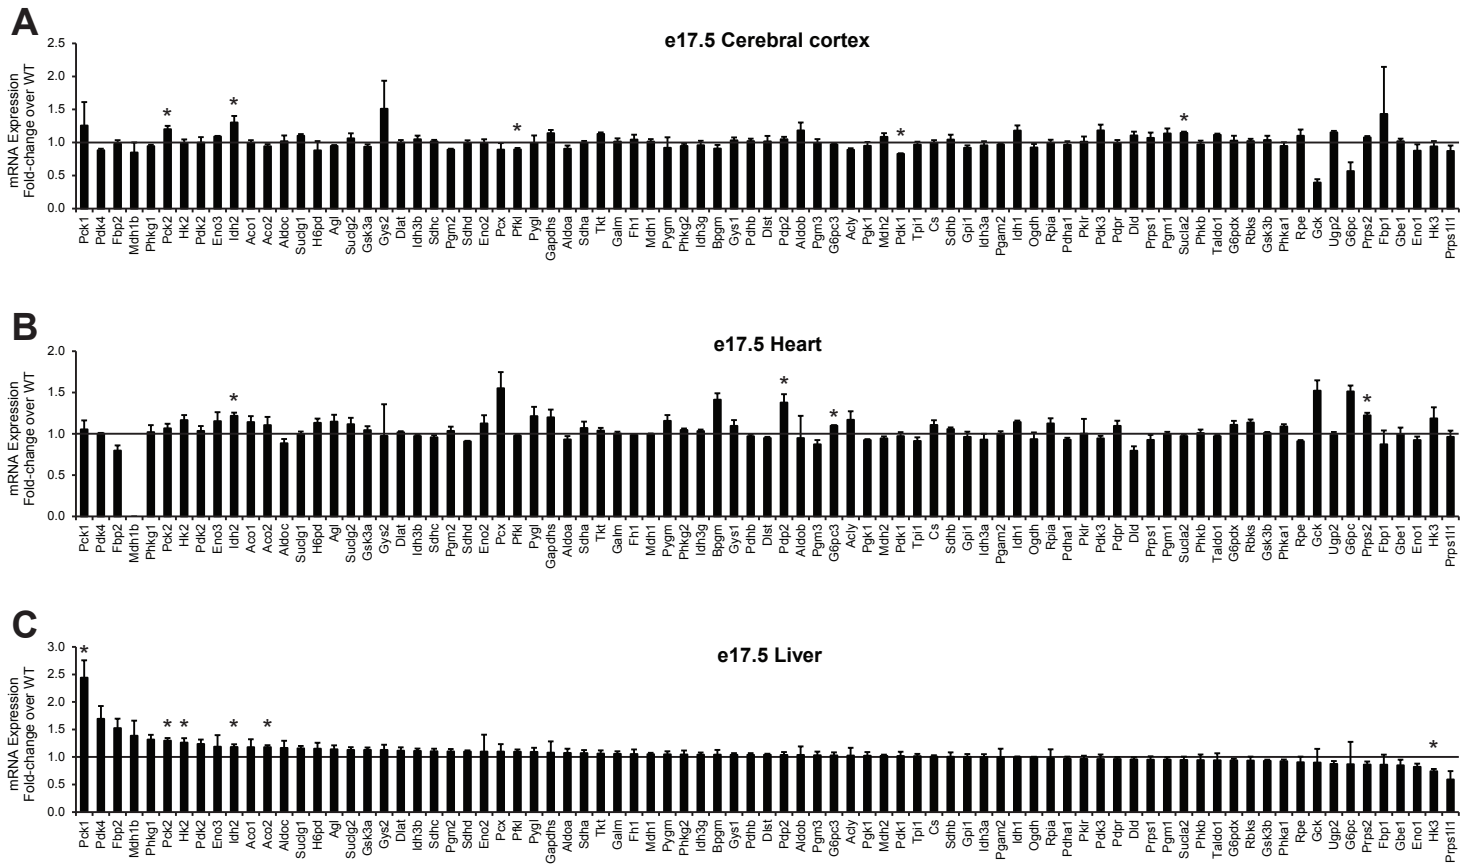

Figure S4

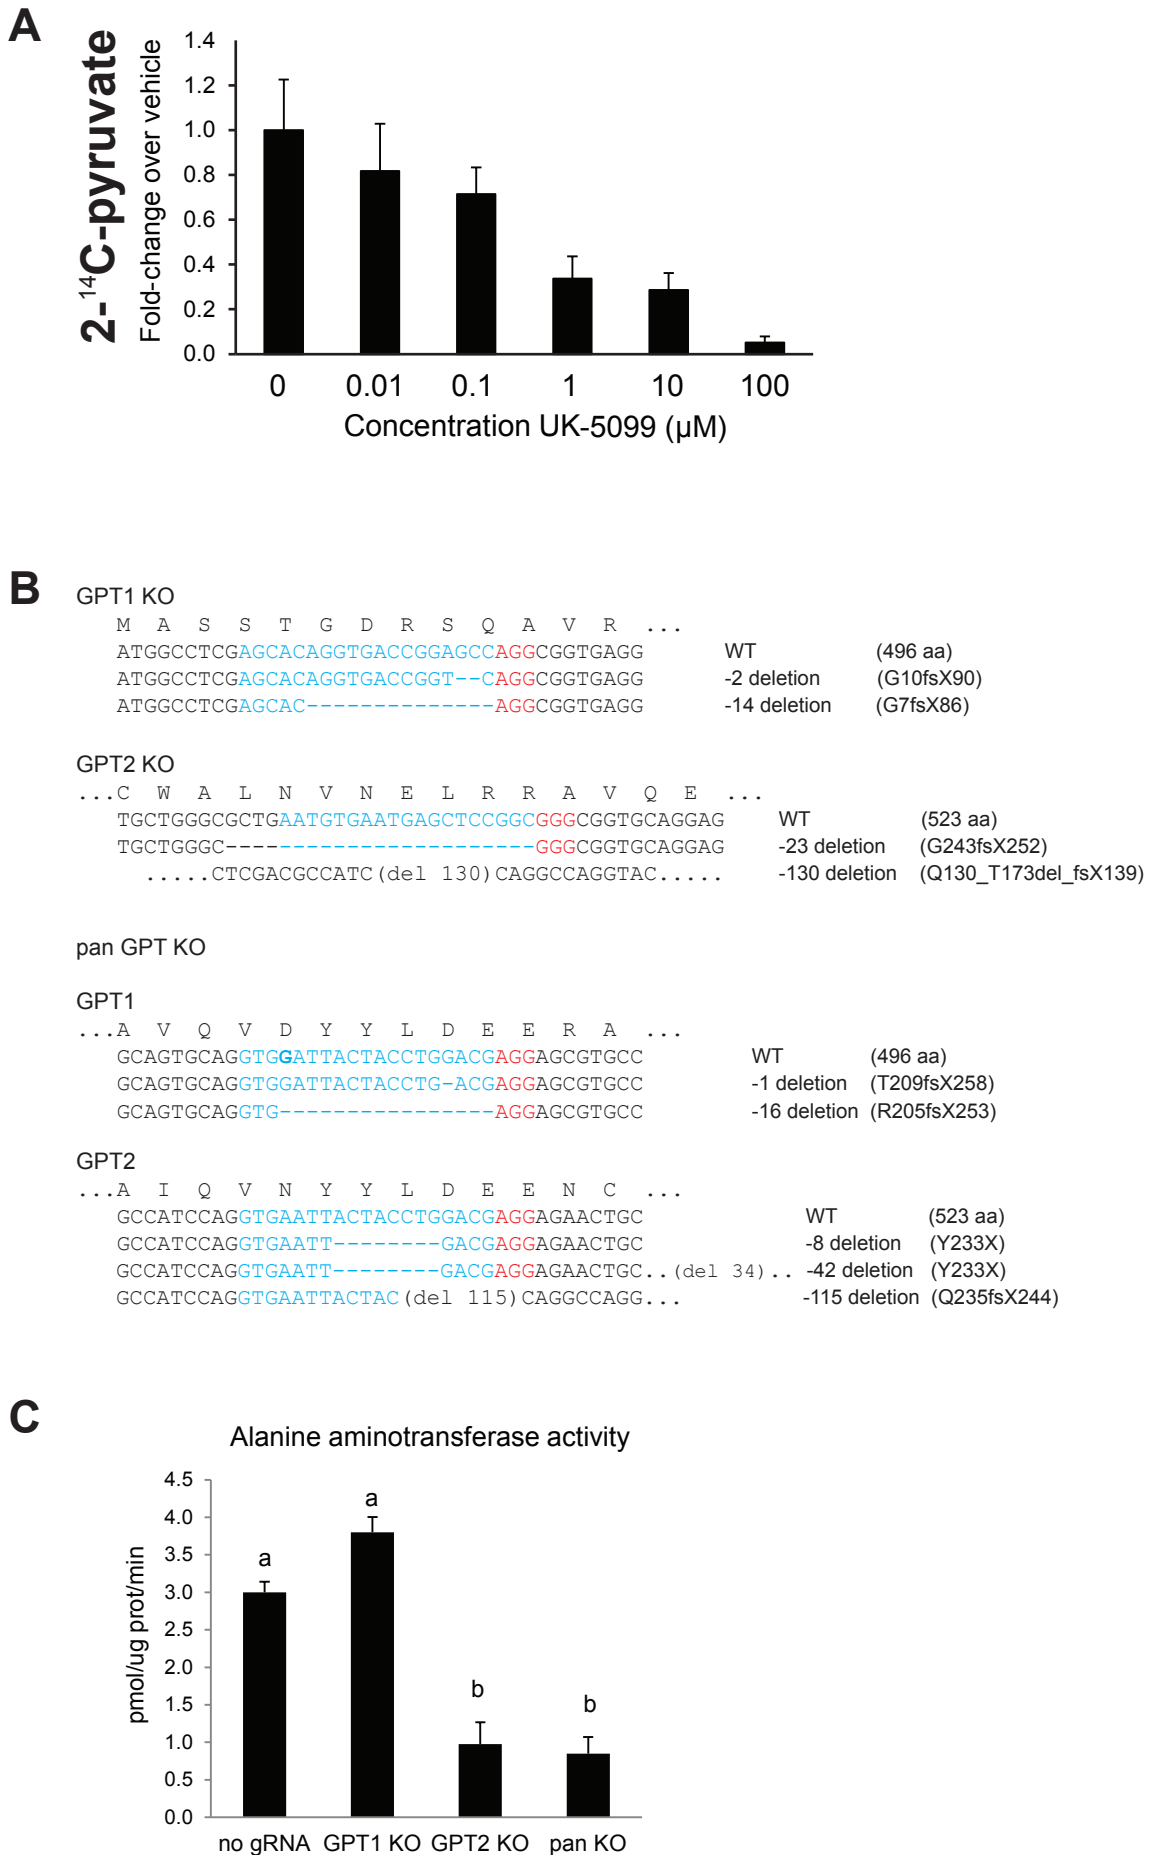

**Table S1****Metabolites significantly regulated by Mpc1 deficiency in e17.5 brain**

| Biochemical Name                            | Mpc1 KI/WT | p-value |
|---------------------------------------------|------------|---------|
| hypotaurine                                 | 15.51      | 0.0000  |
| pyruvate                                    | 5.04       | 0.0000  |
| 4-imidazoleacetate                          | 3.16       | 0.0000  |
| phenyllactate (PLA)                         | 2.98       | 0.0001  |
| histamine                                   | 2.77       | 0.0113  |
| sphingomyelin (d18:1/15:0, d16:1/17:0)      | 2.35       | 0.0025  |
| N-acetylglycine                             | 2.34       | 0.0000  |
| N-acetylhistidine                           | 2.30       | 0.0000  |
| sarcosine (N-Methylglycine)                 | 2.24       | 0.0000  |
| serine                                      | 2.19       | 0.0000  |
| sphingomyelin (d18:1/14:0, d16:1/16:0)      | 2.06       | 0.0007  |
| 4-vinylphenol sulfate                       | 2.00       | 0.0210  |
| proline                                     | 1.98       | 0.0000  |
| glycine                                     | 1.94       | 0.0000  |
| guanidinoacetate                            | 1.93       | 0.0003  |
| lactate                                     | 1.89       | 0.0000  |
| phenylacetylglycine                         | 1.88       | 0.0009  |
| 3-indoxyl sulfate                           | 1.88       | 0.0033  |
| N-acetylserine                              | 1.84       | 0.0000  |
| imidazole propionate                        | 1.84       | 0.0013  |
| aspartate                                   | 1.83       | 0.0000  |
| anserine                                    | 1.83       | 0.0000  |
| 1-palmitoyl-2-linoleoyl-GPE (16:0/18:2)     | 1.81       | 0.0025  |
| catechol sulfate                            | 1.80       | 0.0028  |
| beta-alanine                                | 1.78       | 0.0000  |
| hippurate                                   | 1.76       | 0.0396  |
| N6-acetyllysine                             | 1.75       | 0.0219  |
| phenol sulfate                              | 1.72       | 0.0150  |
| 4-acetamidobutanoate                        | 1.71       | 0.0000  |
| cysteine                                    | 1.68       | 0.0000  |
| cysteine sulfinic acid                      | 1.67       | 0.0413  |
| 2-aminophenol sulfate                       | 1.63       | 0.0137  |
| methylsuccinate                             | 1.61       | 0.0000  |
| carnosine                                   | 1.61       | 0.0081  |
| isovalerylcarnitine                         | 1.60       | 0.0036  |
| ethylmalonate                               | 1.59       | 0.0000  |
| 2-methylcitrate/homocitrate                 | 1.59       | 0.0001  |
| N-acetyltaurine                             | 1.55       | 0.0002  |
| gamma-glutamyl-epsilon-lysine               | 1.55       | 0.0009  |
| orotate                                     | 1.55       | 0.0001  |
| 1-methylimidazoleacetate                    | 1.54       | 0.0004  |
| beta-hydroxyisovalerate                     | 1.54       | 0.0001  |
| palmitoyl dihydrosphingomyelin (d18:0/16:0) | 1.54       | 0.0211  |
| beta-hydroxyisovalerylcarnitine             | 1.52       | 0.0001  |

|                                         |      |        |
|-----------------------------------------|------|--------|
| 3-ureidopropionate                      | 1.52 | 0.0037 |
| 4-hydroxyphenylpyruvate                 | 1.49 | 0.0091 |
| N-acetylalanine                         | 1.48 | 0.0010 |
| N-formylmethionine                      | 1.48 | 0.0001 |
| N-acetylvaline                          | 1.46 | 0.0003 |
| N-acetylmethionine                      | 1.46 | 0.0001 |
| 1,2-dioleoyl-GPS (18:1/18:1)            | 1.46 | 0.0087 |
| N-acetylthreonine                       | 1.45 | 0.0001 |
| betaine                                 | 1.42 | 0.0011 |
| methylmalonate (MMA)                    | 1.42 | 0.0013 |
| N-acetylphenylalanine                   | 1.41 | 0.0001 |
| N-methylproline                         | 1.41 | 0.0071 |
| pyrraline                               | 1.41 | 0.0027 |
| N-acetylputrescine                      | 1.38 | 0.0015 |
| 1-stearoyl-2-linoleoyl-GPE (18:0/18:2)  | 1.38 | 0.0116 |
| N-acetylarginine                        | 1.36 | 0.0040 |
| trigonelline (N'-methylnicotinate)      | 1.35 | 0.0032 |
| N-glycolylneuraminate                   | 1.35 | 0.0360 |
| 1-oleoyl-GPE (18:1)                     | 1.34 | 0.0434 |
| sphinganine                             | 1.34 | 0.0352 |
| succinylcarnitine                       | 1.33 | 0.0275 |
| arginine                                | 1.32 | 0.0102 |
| 3-hydroxyisobutyrate                    | 1.29 | 0.0150 |
| 2-hydroxyglutarate                      | 1.26 | 0.0006 |
| N-acetyltyrosine                        | 1.25 | 0.0488 |
| argininosuccinate                       | 1.25 | 0.0243 |
| 1,2-dioleoyl-GPC (18:1/18:1)            | 1.25 | 0.0411 |
| carnitine                               | 1.20 | 0.0373 |
| 1-palmitoyl-2-linoleoyl-GPC (16:0/18:2) | 1.20 | 0.0403 |
| lysine                                  | 1.18 | 0.0038 |
| prolylglycine                           | 1.18 | 0.0001 |
| acetylcarnitine                         | 1.18 | 0.0353 |
| 1-palmitoleoyl-GPC (16:1)               | 1.17 | 0.0403 |
| N-acetyl-aspartyl-glutamate (NAAG)      | 1.16 | 0.0177 |
| N-acetylglucosaminylasparagine          | 1.09 | 0.0027 |
| glycerophosphoglycerol                  | 0.93 | 0.0174 |
| ribitol                                 | 0.90 | 0.0107 |
| glycerate                               | 0.89 | 0.0076 |
| gulonic acid                            | 0.88 | 0.0157 |
| allantoin                               | 0.87 | 0.0138 |
| tartronate (hydroxymalonate)            | 0.87 | 0.0363 |
| myo-inositol                            | 0.86 | 0.0227 |
| oxalate (ethanedioate)                  | 0.86 | 0.0023 |
| trans-4-hydroxyproline                  | 0.84 | 0.0054 |
| glucosamine-6-phosphate                 | 0.84 | 0.0469 |
| adenosine 5'-diphosphate (ADP)          | 0.84 | 0.0295 |
| 1-methylnicotinamide                    | 0.84 | 0.0462 |

|                                    |      |        |
|------------------------------------|------|--------|
| gamma-aminobutyrate (GABA)         | 0.82 | 0.0064 |
| erythronate                        | 0.82 | 0.0001 |
| leucine                            | 0.81 | 0.0105 |
| oleoyl ethanolamide                | 0.81 | 0.0005 |
| palmitoyl ethanolamide             | 0.80 | 0.0001 |
| 2'-deoxycytidine                   | 0.79 | 0.0087 |
| threonate                          | 0.79 | 0.0003 |
| valine                             | 0.78 | 0.0149 |
| gamma-glutamylisoleucine           | 0.78 | 0.0228 |
| glycerophosphoethanolamine         | 0.78 | 0.0001 |
| hexanoylcarnitine                  | 0.77 | 0.0170 |
| citrate                            | 0.76 | 0.0077 |
| pseudouridine                      | 0.76 | 0.0000 |
| N-palmitoyltaurine                 | 0.75 | 0.0134 |
| spermidine                         | 0.74 | 0.0002 |
| mannitol/sorbitol                  | 0.73 | 0.0017 |
| palmitoylcarnitine                 | 0.73 | 0.0030 |
| glutamate                          | 0.72 | 0.0000 |
| glutamate, gamma-methyl ester      | 0.72 | 0.0012 |
| gamma-glutamylvaline               | 0.72 | 0.0034 |
| isocitrate                         | 0.71 | 0.0012 |
| docosapentaenoate (n6 DPA; 22:5n6) | 0.71 | 0.0275 |
| stearoylcarnitine                  | 0.71 | 0.0061 |
| glutathione, oxidized (GSSG)       | 0.70 | 0.0001 |
| 5-oxoproline                       | 0.70 | 0.0314 |
| galactose 1-phosphate              | 0.70 | 0.0188 |
| galactonate                        | 0.70 | 0.0036 |
| laurylcarnitine                    | 0.70 | 0.0014 |
| citrulline                         | 0.69 | 0.0063 |
| 2-aminoheptanoate                  | 0.69 | 0.0003 |
| octanoylcarnitine                  | 0.69 | 0.0033 |
| glycerophosphorylcholine (GPC)     | 0.69 | 0.0000 |
| glycerol                           | 0.69 | 0.0045 |
| 2-aminoadipate                     | 0.68 | 0.0207 |
| kynurenine                         | 0.67 | 0.0033 |
| S-adenosylhomocysteine (SAH)       | 0.67 | 0.0078 |
| ascorbate (Vitamin C)              | 0.67 | 0.0061 |
| 1-methylhistidine                  | 0.66 | 0.0000 |
| cystathionine                      | 0.66 | 0.0024 |
| ophthalmate                        | 0.66 | 0.0202 |
| myristoleoylcarnitine              | 0.66 | 0.0003 |
| 2-aminobutyrate                    | 0.65 | 0.0039 |
| gamma-glutamylmethionine           | 0.65 | 0.0376 |
| succinate                          | 0.65 | 0.0012 |
| myristoylcarnitine                 | 0.65 | 0.0000 |
| gamma-glutamylleucine              | 0.62 | 0.0006 |
| tryptophan                         | 0.60 | 0.0000 |



|                                                  |      |        |
|--------------------------------------------------|------|--------|
| isoleucine                                       | 0.60 | 0.0015 |
| 3-methyl-2-oxovalerate                           | 0.60 | 0.0059 |
| methionine sulfone                               | 0.60 | 0.0008 |
| S-methylglutathione                              | 0.60 | 0.0170 |
| homocitrulline                                   | 0.59 | 0.0005 |
| glutathione, reduced (GSH)                       | 0.58 | 0.0013 |
| gamma-glutamylthreonine                          | 0.56 | 0.0004 |
| gamma-glutamylglutamine                          | 0.54 | 0.0001 |
| glycerol 3-phosphate                             | 0.54 | 0.0001 |
| S-methylcysteine                                 | 0.53 | 0.0018 |
| N-delta-acetylornithine                          | 0.53 | 0.0000 |
| 3-methylhistidine                                | 0.47 | 0.0000 |
| 3-methoxytyrosine                                | 0.45 | 0.0000 |
| nicotinamide adenine dinucleotide reduced (NADH) | 0.45 | 0.0001 |
| 2-hydroxyadipate                                 | 0.42 | 0.0003 |
| glutamine                                        | 0.39 | 0.0000 |
| alanine                                          | 0.32 | 0.0000 |

#### Metabolites significantly regulated by Mpc1 deficiency in e17.5 liver

| Biochemical Name                                   | Mpc1 KI/WT | p-value |
|----------------------------------------------------|------------|---------|
| 3-methylglutaryl carnitine (2)                     | 3.68       | 0.0003  |
| heme                                               | 2.99       | 0.0005  |
| pyruvate                                           | 2.61       | 0.0017  |
| 4-imidazoleacetate                                 | 2.41       | 0.0021  |
| sphingomyelin (d18:1/14:0, d16:1/16:0)             | 2.41       | 0.0000  |
| 1-linoleoyl-GPE (18:2)                             | 2.35       | 0.0024  |
| 1-arachidonylglycerol (20:4)                       | 2.35       | 0.0079  |
| palmitoyl dihydrosphingomyelin (d18:0/16:0)        | 2.30       | 0.0000  |
| histamine                                          | 2.19       | 0.0002  |
| 1-palmitoyl-2-linoleoyl-GPG (16:0/18:2)            | 2.16       | 0.0000  |
| 1-arachidonoyl-GPE (20:4)                          | 2.10       | 0.0069  |
| biliverdin                                         | 2.03       | 0.0283  |
| sphingomyelin (d18:1/15:0, d16:1/17:0)             | 2.00       | 0.0000  |
| docosahexaenoate (DHA; 22:6n3)                     | 1.96       | 0.0066  |
| sphingomyelin (d18:1/17:0, d17:1/18:0, d19:1/16:0) | 1.96       | 0.0000  |
| 2-arachidonoylglycerol (20:4)                      | 1.95       | 0.0424  |
| indolepropionate                                   | 1.94       | 0.0371  |
| sphinganine                                        | 1.92       | 0.0004  |
| 1-stearoyl-GPS (18:0)                              | 1.90       | 0.0090  |
| stearoyl sphingomyelin (d18:1/18:0)                | 1.90       | 0.0000  |
| adenosine 3',5'-diphosphate                        | 1.84       | 0.0230  |
| 1-docosahexaenoyl-GPE (22:6)                       | 1.80       | 0.0267  |
| eicosapentaenoate (EPA; 20:5n3)                    | 1.77       | 0.0023  |
| N-acetylhistidine                                  | 1.73       | 0.0049  |
| methylsuccinate                                    | 1.72       | 0.0035  |
| 1-palmitoyl-2-linoleoyl-GPE (16:0/18:2)            | 1.69       | 0.0003  |
| 1-stearoyl-2-arachidonoyl-GPS (18:0/20:4)          | 1.67       | 0.0003  |

|                                                       |      |        |
|-------------------------------------------------------|------|--------|
| sphingomyelin (d18:1/20:0, d16:1/22:0)                | 1.66 | 0.0000 |
| N-acetyltaurine                                       | 1.64 | 0.0012 |
| gamma-carboxyglutamate                                | 1.62 | 0.0005 |
| 1-stearoyl-2-linoleoyl-GPE (18:0/18:2)                | 1.62 | 0.0005 |
| 1-palmitoyl-2-arachidonoyl-GPE (16:0/20:4)            | 1.60 | 0.0000 |
| p-cresol-glucuronide                                  | 1.56 | 0.0479 |
| 1-oleoyl-GPE (18:1)                                   | 1.55 | 0.0164 |
| N-acetylmethionine sulfoxide                          | 1.53 | 0.0211 |
| gamma-glutamylglycine                                 | 1.53 | 0.0350 |
| 1-palmitoyl-GPE (16:0)                                | 1.53 | 0.0058 |
| 2-palmitoleoyl-GPC (16:1)                             | 1.51 | 0.0377 |
| sphingomyelin (d18:1/18:1, d18:2/18:0)                | 1.50 | 0.0004 |
| palmitoyl sphingomyelin (d18:1/16:0)                  | 1.49 | 0.0000 |
| N-acetylphenylalanine                                 | 1.48 | 0.0009 |
| phenylacetylglycine                                   | 1.48 | 0.0300 |
| ethylmalonate                                         | 1.48 | 0.0000 |
| 1-oleoyl-2-linoleoyl-GPE (18:1/18:2)                  | 1.45 | 0.0008 |
| flavin adenine dinucleotide (FAD)                     | 1.45 | 0.0185 |
| N-acetylglycine                                       | 1.44 | 0.0040 |
| guanosine 5'- monophosphate (5'-GMP)                  | 1.43 | 0.0007 |
| 1-stearoyl-GPE (18:0)                                 | 1.42 | 0.0020 |
| histidine                                             | 1.41 | 0.0498 |
| glycine                                               | 1.40 | 0.0015 |
| 1-stearoyl-2-arachidonoyl-GPE (18:0/20:4)             | 1.40 | 0.0014 |
| 1,2-dilinoeoyl-GPC (18:2/18:2)                        | 1.40 | 0.0003 |
| N-palmitoyl-sphingosine (d18:1/16:0)                  | 1.40 | 0.0175 |
| sphingomyelin (d18:1/22:1, d18:2/22:0, d16:1/24:1)    | 1.40 | 0.0016 |
| 1-stearoyl-2-oleoyl-GPS (18:0/18:1)                   | 1.39 | 0.0153 |
| N-acetyltyrosine                                      | 1.38 | 0.0445 |
| 1-stearoyl-2-arachidonoyl-GPI (18:0/20:4)             | 1.38 | 0.0104 |
| sulfate                                               | 1.38 | 0.0106 |
| phosphoethanolamine                                   | 1.37 | 0.0061 |
| 1-stearoyl-2-linoleoyl-GPC (18:0/18:2)                | 1.36 | 0.0084 |
| serine                                                | 1.35 | 0.0022 |
| 3-indoxyl sulfate                                     | 1.35 | 0.0453 |
| 1-methylhistamine                                     | 1.34 | 0.0241 |
| 1-stearoyl-2-arachidonoyl-GPC (18:0/20:4)             | 1.34 | 0.0228 |
| 1-(1-enyl-palmitoyl)-2-arachidonoyl-GPE (P-16:0/20:4) | 1.33 | 0.0046 |
| 1-palmitoleoyl-2-linoleoyl-GPC (16:1/18:2)            | 1.32 | 0.0028 |
| 1-(1-enyl-palmitoyl)-2-linoleoyl-GPE (P-16:0/18:2)    | 1.32 | 0.0124 |
| sphingomyelin (d18:2/24:1, d18:1/24:2)                | 1.31 | 0.0082 |
| 1-linoleoyl-2-arachidonoyl-GPC (18:2/20:4)            | 1.30 | 0.0006 |
| anserine                                              | 1.29 | 0.0244 |
| adenosine 5'-diphosphate (ADP)                        | 1.29 | 0.0116 |
| 1-oleoyl-2-linoleoyl-GPC (18:1/18:2)                  | 1.25 | 0.0010 |
| 1,2-dipalmitoyl-GPC (16:0/16:0)                       | 1.24 | 0.0034 |
| 1-palmitoyl-2-linoleoyl-GPC (16:0/18:2)               | 1.23 | 0.0024 |

|                                            |      |        |
|--------------------------------------------|------|--------|
| 1-palmitoyl-2-oleoyl-GPE (16:0/18:1)       | 1.23 | 0.0362 |
| sphingomyelin (d18:2/16:0, d18:1/16:1)     | 1.23 | 0.0013 |
| pyridoxamine phosphate                     | 1.23 | 0.0131 |
| proline                                    | 1.22 | 0.0366 |
| lactate                                    | 1.21 | 0.0015 |
| palmitoyl ethanolamide                     | 1.21 | 0.0360 |
| beta-hydroxyisovaleroylcarnitine           | 1.18 | 0.0185 |
| adenosine 5'-monophosphate (AMP)           | 1.18 | 0.0207 |
| 1-palmitoyl-2-arachidonoyl-GPC (16:0/20:4) | 1.16 | 0.0154 |
| N-acetylglucosaminylasparagine             | 1.12 | 0.0104 |
| carnitine                                  | 0.87 | 0.0149 |
| methionine sulfoxide                       | 0.86 | 0.0373 |
| threonate                                  | 0.85 | 0.0158 |
| 2'-deoxyuridine                            | 0.84 | 0.0390 |
| pro-hydroxy-pro                            | 0.81 | 0.0451 |
| 2-aminoheptanoate                          | 0.81 | 0.0030 |
| glutamate                                  | 0.79 | 0.0304 |
| thiamin diphosphate                        | 0.79 | 0.0091 |
| erythronate                                | 0.78 | 0.0008 |
| tryptophan                                 | 0.77 | 0.0073 |
| trans-4-hydroxyproline                     | 0.77 | 0.0003 |
| ribitol                                    | 0.77 | 0.0022 |
| erythritol                                 | 0.77 | 0.0029 |
| alanine                                    | 0.76 | 0.0005 |
| 1-methylhistidine                          | 0.76 | 0.0022 |
| citrulline                                 | 0.76 | 0.0003 |
| 5-methylthioadenosine (MTA)                | 0.75 | 0.0012 |
| mannitol/sorbitol                          | 0.75 | 0.0244 |
| glycerol                                   | 0.75 | 0.0115 |
| oxalate (ethanedioate)                     | 0.75 | 0.0000 |
| N6,N6,N6-trimethyllysine                   | 0.74 | 0.0023 |
| 3-methoxytyrosine                          | 0.74 | 0.0496 |
| putrescine                                 | 0.74 | 0.0249 |
| gamma-glutamylisoleucine                   | 0.74 | 0.0006 |
| gamma-glutamylleucine                      | 0.73 | 0.0076 |
| orotate                                    | 0.73 | 0.0499 |
| 2'-deoxycytidine                           | 0.73 | 0.0236 |
| glycerol 3-phosphate                       | 0.72 | 0.0279 |
| thymidine                                  | 0.72 | 0.0363 |
| orotidine                                  | 0.71 | 0.0003 |
| pseudouridine                              | 0.71 | 0.0000 |
| S-adenosylhomocysteine (SAH)               | 0.70 | 0.0226 |
| 5-methyl-2'-deoxycytidine                  | 0.70 | 0.0118 |
| ergothioneine                              | 0.70 | 0.0004 |
| homocitrulline                             | 0.69 | 0.0017 |
| gamma-glutamylvaline                       | 0.69 | 0.0002 |
| N6-succinyladenosine                       | 0.69 | 0.0403 |

|                                          |      |        |
|------------------------------------------|------|--------|
| N4-acetylcytidine                        | 0.68 | 0.0010 |
| 2-aminobutyrate                          | 0.67 | 0.0475 |
| creatine                                 | 0.67 | 0.0000 |
| N-acetylglucosamine 6-phosphate          | 0.67 | 0.0344 |
| maleate                                  | 0.67 | 0.0001 |
| nicotinamide adenine dinucleotide (NAD+) | 0.67 | 0.0156 |
| dimethylglycine                          | 0.66 | 0.0000 |
| N-delta-acetylornithine                  | 0.66 | 0.0001 |
| arabitol/xylitol                         | 0.66 | 0.0085 |
| methionine sulfone                       | 0.65 | 0.0005 |
| cysteine-glutathione disulfide           | 0.64 | 0.0182 |
| gamma-glutamylthreonine                  | 0.64 | 0.0085 |
| gamma-glutamyltryptophan                 | 0.64 | 0.0119 |
| alpha-ketoglutarate                      | 0.62 | 0.0001 |
| 2-hydroxyglutarate                       | 0.62 | 0.0091 |
| S-methylglutathione                      | 0.61 | 0.0139 |
| gamma-glutamylalanine                    | 0.61 | 0.0010 |
| fumarate                                 | 0.61 | 0.0000 |
| 3-methylhistidine                        | 0.60 | 0.0014 |
| alpha-hydroxyisocaproate                 | 0.59 | 0.0376 |
| malate                                   | 0.59 | 0.0001 |
| gulonic acid                             | 0.59 | 0.0000 |
| ophthalmate                              | 0.57 | 0.0398 |
| argininosuccinate                        | 0.56 | 0.0007 |
| N-acetyl-glucosamine 1-phosphate         | 0.55 | 0.0102 |
| 5-ketogluconate                          | 0.55 | 0.0000 |
| creatinine                               | 0.54 | 0.0000 |
| pipecolate                               | 0.53 | 0.0006 |
| glutamine                                | 0.51 | 0.0152 |
| isovalerylcarnitine                      | 0.50 | 0.0414 |
| glutarylcarnitine (C5)                   | 0.49 | 0.0104 |
| 3-methylglutarylcarnitine (1)            | 0.43 | 0.0003 |
| pregn steroid monosulfate                | 0.43 | 0.0000 |
| N-carbamoylaspartate                     | 0.37 | 0.0013 |
| creatine phosphate                       | 0.33 | 0.0011 |
| isobutyrylcarnitine                      | 0.31 | 0.0015 |
